# Supplementary material for: Prone Positioning Improves Ventilation-Perfusion Matching Assessed by Electrical Impedance Tomography in Patients with ARDS: A Prospective Physiological Study
Source: Research Square preprint supplement (doi:10.21203/rs.3.rs-1388270/v1), 2022-02-28
Supplement: Supplementary file 1 [file e2e3d9ecfd0e8ab088299838.docx]

Fig. S1. Ventilation and perfusion measured by EIT in a representative patient. A. Representative image of the ventilation (blue-color map) distribution. B. Representative image of the perfusion (red-color map) distribution. C. Representative map obtained by integrating ventilation and perfusion maps: the grey area indicates matched units which are both ventilated and perfused, while red area indicated only perfused units and blue area only ventilated units. D. Representative map with the percentage of ventilation (blue numbers) and perfusion (red numbers) distribution in the horizontal regions of interest (ROIs).

Fig. S2. Typical ventilation and perfusion matching images of a patient at T0, T1 and T2. During prone ventilation, pulmonary blood flow is mostly unmodified at the early stage and then gradually changes over time. Long prone ventilation increases dorsal ventilation and perfusion, which results in improved ventilation-perfusion matching.

Fig. S3. Representative chest CT images obtained before prone position and after prone position sessions.
